# Supplementary material for: The Apraxia of Speech Rating Scale: Reliability, Validity, and Utility
Source: PubMed Central journal article supplement — Am J Speech Lang Pathol. 2023 Jan 11;32(2):469–91. doi: 10.1044/2022_AJSLP-22-00148 (PMC10171845; doi:10.1044/2022_ajslp-22-00148), 2023-01-11
Supplement: AJSLP-32-469-s001.pdf [file AJSLP-32-469-s001.pdf]

**Supplemental Material S1.** Subgroup item data.

Distribution of 0–4 ratings (%) for ASRS items (see Appendix for complete item labels); highest frequency for each group in boldface. Last row provides Total score median (Q1, Q3).

Part 1: AOS absent cases

|                                                        | <b>Dysarthria &amp;<br/>aphasia absent<br/>(<i>n</i> = 20)</b> | <b>Dysarthria &amp;<br/>aphasia present<br/>(<i>n</i> = 3)</b> | <b>Dysarthria absent &amp;<br/>aphasia present<br/>(<i>n</i> = 100)</b> | <b>Dysarthria present<br/>&amp; aphasia absent<br/>(<i>n</i> = 65)</b> | <b>Total<br/>(<i>N</i> = 188)</b> |
|--------------------------------------------------------|----------------------------------------------------------------|----------------------------------------------------------------|-------------------------------------------------------------------------|------------------------------------------------------------------------|-----------------------------------|
| <b>1. Distortions</b>                                  |                                                                |                                                                |                                                                         |                                                                        |                                   |
| 0                                                      | 13 (65%)                                                       | 0 (0%)                                                         | 82 (82%)                                                                | 14 (22%)                                                               | 109 (58%)                         |
| 1                                                      | 5 (25%)                                                        | 3 (100%)                                                       | 17 (17%)                                                                | 20 (31%)                                                               | 45 (24%)                          |
| 2                                                      | 1 (5%)                                                         | 0 (0%)                                                         | 1 (1%)                                                                  | 21 (32%)                                                               | 23 (12%)                          |
| 3                                                      | 1 (5%)                                                         | 0 (0%)                                                         | 0 (0%)                                                                  | 6 (9%)                                                                 | 7 (4%)                            |
| 4                                                      | 0 (0%)                                                         | 0 (0%)                                                         | 0 (0%)                                                                  | 4 (6%)                                                                 | 4 (2%)                            |
| <b>2. Distorted substitutions</b>                      |                                                                |                                                                |                                                                         |                                                                        |                                   |
| 0                                                      | 20 (100%)                                                      | 1 (33%)                                                        | 72 (72%)                                                                | 63 (97%)                                                               | 156 (83%)                         |
| 1                                                      | 0 (0%)                                                         | 2 (67%)                                                        | 27 (27%)                                                                | 2 (3%)                                                                 | 31 (16%)                          |
| 2                                                      | 0 (0%)                                                         | 0 (0%)                                                         | 1 (1%)                                                                  | 0 (0%)                                                                 | 1 (1%)                            |
| <b>3. Distorted additions</b>                          |                                                                |                                                                |                                                                         |                                                                        |                                   |
| 0                                                      | 18 (90%)                                                       | 3 (100%)                                                       | 97 (97%)                                                                | 65 (100%)                                                              | 183 (97%)                         |
| 1                                                      | 2 (10%)                                                        | 0 (0%)                                                         | 3 (3%)                                                                  | 0 (0%)                                                                 | 5 (3%)                            |
| <b>4. Increased errors with<br/>length/ complexity</b> |                                                                |                                                                |                                                                         |                                                                        |                                   |
| 0                                                      | 19 (95%)                                                       | 1 (33%)                                                        | 73 (73%)                                                                | 56 (86%)                                                               | 149 (79%)                         |
| 1                                                      | 1 (5%)                                                         | 2 (67%)                                                        | 23 (23%)                                                                | 7 (11%)                                                                | 33 (18%)                          |
| 2                                                      | 0 (0%)                                                         | 0 (0%)                                                         | 4 (4%)                                                                  | 2 (3%)                                                                 | 6 (3%)                            |
| <b>5. Segmentation within<br/>words</b>                |                                                                |                                                                |                                                                         |                                                                        |                                   |
| 0                                                      | 19 (95%)                                                       | 3 (100%)                                                       | 96 (96%)                                                                | 62 (95%)                                                               | 180 (96%)                         |
| 1                                                      | 1 (5%)                                                         | 0 (0%)                                                         | 4 (4%)                                                                  | 3 (5%)                                                                 | 8 (4%)                            |

**6. Segmentation across words**

|   |          |          |          |          |           |
|---|----------|----------|----------|----------|-----------|
| 0 | 19 (95%) | 3 (100%) | 98 (98%) | 60 (92%) | 180 (96%) |
| 1 | 1 (5%)   | 0 (0%)   | 2 (2%)   | 3 (5%)   | 6 (3%)    |
| 2 | 0 (0%)   | 0 (0%)   | 0 (0%)   | 2 (3%)   | 2 (1%)    |

**7. Slow rate**

|   |          |         |          |          |           |
|---|----------|---------|----------|----------|-----------|
| 0 | 16 (80%) | 1 (33%) | 98 (98%) | 38 (58%) | 153 (81%) |
| 1 | 3 (15%)  | 1 (33%) | 1 (1%)   | 16 (25%) | 21 (11%)  |
| 2 | 1 (5%)   | 1 (33%) | 1 (1%)   | 9 (14%)  | 12 (6%)   |
| 3 | 0 (0%)   | 0 (0%)  | 0 (0%)   | 2 (3%)   | 2 (1%)    |

**8. Lengthened segments**

|   |          |         |          |          |           |
|---|----------|---------|----------|----------|-----------|
| 0 | 19 (95%) | 1 (33%) | 92 (92%) | 62 (95%) | 174 (93%) |
| 1 | 1 (5%)   | 2 (67%) | 8 (8%)   | 3 (5%)   | 14 (7%)   |

**9. AMRs**

|   |          |         |          |          |           |
|---|----------|---------|----------|----------|-----------|
| 0 | 15 (75%) | 2 (67%) | 88 (88%) | 31 (48%) | 136 (72%) |
| 1 | 2 (10%)  | 0 (0%)  | 12 (12%) | 19 (29%) | 33 (18%)  |
| 2 | 2 (10%)  | 1 (33%) | 0 (0%)   | 12 (18%) | 15 (8%)   |
| 3 | 1 (5%)   | 0 (0%)  | 0 (0%)   | 2 (3%)   | 3 (2%)    |
| 4 | 0 (0%)   | 0 (0%)  | 0 (0%)   | 1 (2%)   | 1 (1%)    |

**10. SMRs**

|   |          |         |          |          |           |
|---|----------|---------|----------|----------|-----------|
| 0 | 17 (85%) | 1 (33%) | 73 (73%) | 48 (74%) | 139 (74%) |
| 1 | 2 (10%)  | 2 (67%) | 13 (13%) | 9 (14%)  | 26 (14%)  |
| 2 | 1 (5%)   | 0 (0%)  | 10 (10%) | 8 (12%)  | 19 (10%)  |
| 3 | 0 (0%)   | 0 (0%)  | 4 (4%)   | 0 (0%)   | 4 (2%)    |

**11. Reduced words or AMRs per breath**

|   |           |          |            |          |           |
|---|-----------|----------|------------|----------|-----------|
| 0 | 20 (100%) | 3 (100%) | 100 (100%) | 64 (98%) | 187 (99%) |
| 2 | 0 (0%)    | 0 (0%)   | 0 (0%)     | 1 (2%)   | 1 (1%)    |

**12. Visible/silent groping**

|   |           |         |          |           |           |
|---|-----------|---------|----------|-----------|-----------|
| 0 | 20 (100%) | 1 (33%) | 95 (95%) | 65 (100%) | 181 (96%) |
| 1 | 0 (0%)    | 2 (67%) | 5 (5%)   | 0 (0%)    | 7 (4%)    |

**13. False starts**

|                    |          |          |          |          |           |
|--------------------|----------|----------|----------|----------|-----------|
| 0                  | 17 (85%) | 1 (33%)  | 49 (49%) | 54 (83%) | 121 (64%) |
| 1                  | 2 (10%)  | 2 (67%)  | 43 (43%) | 8 (12%)  | 55 (29%)  |
| 2                  | 0 (0%)   | 0 (0%)   | 7 (7%)   | 2 (3%)   | 9 (5%)    |
| 3                  | 1 (5%)   | 0 (0%)   | 1 (1%)   | 1 (2%)   | 3 (2%)    |
| <b>Total score</b> |          |          |          |          |           |
| Median (Q1, Q3)    | 1 (0, 3) | 7 (6, 7) | 1 (0, 4) | 4 (2, 6) | 2 (0, 5)  |

*Note.* 0 = feature not present; 4 = always evident or marked in severity. Total AOS Present group includes participants with or without dysarthria and aphasia.

Part 2: AOS present cases

|                                                    | Dysarthria & aphasia absent<br>( <i>n</i> = 42) | Dysarthria & aphasia present<br>( <i>n</i> = 18) | Dysarthria absent & aphasia present<br>( <i>n</i> = 41) | Dysarthria present & aphasia absent<br>( <i>n</i> = 19) | Total<br>( <i>N</i> = 120) |
|----------------------------------------------------|-------------------------------------------------|--------------------------------------------------|---------------------------------------------------------|---------------------------------------------------------|----------------------------|
| <b>1. Distortions</b>                              |                                                 |                                                  |                                                         |                                                         |                            |
| 0                                                  | 5 (12%)                                         | 0 (0%)                                           | 2 (5%)                                                  | 2 (11%)                                                 | 9 (8%)                     |
| 1                                                  | 18 (43%)                                        | 2 (11%)                                          | 16 (39%)                                                | 5 (26%)                                                 | 41 (34%)                   |
| 2                                                  | 12 (29%)                                        | 4 (22%)                                          | 17 (41%)                                                | 6 (32%)                                                 | 39 (32%)                   |
| 3                                                  | 5 (12%)                                         | 6 (33%)                                          | 3 (7%)                                                  | 4 (21%)                                                 | 18 (15%)                   |
| 4                                                  | 2 (5%)                                          | 6 (33%)                                          | 3 (7%)                                                  | 2 (11%)                                                 | 13 (11%)                   |
| <b>2. Distorted substitutions</b>                  |                                                 |                                                  |                                                         |                                                         |                            |
| 0                                                  | 10 (24%)                                        | 0 (0%)                                           | 3 (7%)                                                  | 4 (21%)                                                 | 17 (14%)                   |
| 1                                                  | 18 (43%)                                        | 2 (11%)                                          | 17 (41%)                                                | 10 (53%)                                                | 47 (39%)                   |
| 2                                                  | 9 (21%)                                         | 6 (33%)                                          | 13 (32%)                                                | 2 (11%)                                                 | 30 (25%)                   |
| 3                                                  | 1 (2%)                                          | 5 (28%)                                          | 5 (12%)                                                 | 2 (11%)                                                 | 13 (11%)                   |
| 4                                                  | 4 (10%)                                         | 5 (28%)                                          | 3 (7%)                                                  | 1 (5%)                                                  | 13 (11%)                   |
| <b>3. Distorted additions</b>                      |                                                 |                                                  |                                                         |                                                         |                            |
| 0                                                  | 23 (55%)                                        | 2 (11%)                                          | 24 (59%)                                                | 11 (58%)                                                | 60 (50%)                   |
| 1                                                  | 15 (36%)                                        | 12 (67%)                                         | 9 (22%)                                                 | 6 (32%)                                                 | 42 (35%)                   |
| 2                                                  | 2 (5%)                                          | 3 (17%)                                          | 6 (15%)                                                 | 1 (5%)                                                  | 12 (10%)                   |
| 3                                                  | 1 (2%)                                          | 0 (0%)                                           | 1 (2%)                                                  | 1 (5%)                                                  | 3 (2%)                     |
| 4                                                  | 1 (2%)                                          | 1 (6%)                                           | 1 (2%)                                                  | 0 (0%)                                                  | 3 (2%)                     |
| <b>4. Increased errors with length/ complexity</b> |                                                 |                                                  |                                                         |                                                         |                            |
| 0                                                  | 4 (10%)                                         | 0 (0%)                                           | 0 (0%)                                                  | 1 (5%)                                                  | 5 (4%)                     |
| 1                                                  | 17 (40%)                                        | 2 (11%)                                          | 11 (27%)                                                | 10 (53%)                                                | 40 (33%)                   |
| 2                                                  | 12 (29%)                                        | 5 (28%)                                          | 17 (41%)                                                | 6 (32%)                                                 | 40 (33%)                   |
| 3                                                  | 6 (14%)                                         | 5 (28%)                                          | 8 (20%)                                                 | 2 (11%)                                                 | 21 (18%)                   |
| 4                                                  | 3 (7%)                                          | 6 (33%)                                          | 5 (12%)                                                 | 0 (0%)                                                  | 14 (12%)                   |
| <b>5. Segmentation within words</b>                |                                                 |                                                  |                                                         |                                                         |                            |
| 0                                                  | 8 (19%)                                         | 3 (17%)                                          | 14 (34%)                                                | 4 (21%)                                                 | 29 (24%)                   |
| 1                                                  | 18 (43%)                                        | 2 (11%)                                          | 16 (39%)                                                | 5 (26%)                                                 | 41 (34%)                   |

|                                     |          |          |          |          |          |
|-------------------------------------|----------|----------|----------|----------|----------|
| 2                                   | 11 (26%) | 7 (39%)  | 7 (17%)  | 6 (32%)  | 31 (26%) |
| 3                                   | 3 (7%)   | 5 (28%)  | 4 (10%)  | 2 (11%)  | 14 (12%) |
| 4                                   | 2 (5%)   | 1 (6%)   | 0 (0%)   | 2 (11%)  | 5 (4%)   |
| <b>6. Segmentation across words</b> |          |          |          |          |          |
| 0                                   | 6 (14%)  | 3 (17%)  | 11 (27%) | 1 (5%)   | 21 (18%) |
| 1                                   | 10 (24%) | 1 (6%)   | 9 (22%)  | 5 (26%)  | 25 (21%) |
| 2                                   | 7 (17%)  | 4 (22%)  | 11 (27%) | 3 (16%)  | 25 (21%) |
| 3                                   | 14 (33%) | 6 (33%)  | 9 (22%)  | 7 (37%)  | 36 (30%) |
| 4                                   | 5 (12%)  | 4 (22%)  | 1 (2%)   | 3 (16%)  | 13 (11%) |
| <b>7. Slow rate</b>                 |          |          |          |          |          |
| 0                                   | 4 (10%)  | 1 (6%)   | 8 (20%)  | 0 (0%)   | 13 (11%) |
| 1                                   | 7 (17%)  | 1 (6%)   | 13 (32%) | 0 (0%)   | 21 (18%) |
| 2                                   | 8 (19%)  | 2 (11%)  | 7 (17%)  | 3 (16%)  | 20 (17%) |
| 3                                   | 15 (36%) | 4 (22%)  | 10 (24%) | 10 (53%) | 39 (32%) |
| 4                                   | 8 (19%)  | 10 (56%) | 3 (7%)   | 6 (32%)  | 27 (22%) |
| <b>8. Lengthened segments</b>       |          |          |          |          |          |
| 0                                   | 14 (33%) | 6 (33%)  | 21 (51%) | 10 (53%) | 51 (42%) |
| 1                                   | 24 (57%) | 8 (44%)  | 20 (49%) | 7 (37%)  | 59 (49%) |
| 2                                   | 4 (10%)  | 4 (22%)  | 0 (0%)   | 2 (11%)  | 10 (8%)  |
| <b>9. AMRs</b>                      |          |          |          |          |          |
| 0                                   | 20 (48%) | 1 (6%)   | 18 (44%) | 5 (26%)  | 44 (37%) |
| 1                                   | 9 (21%)  | 2 (11%)  | 12 (29%) | 7 (37%)  | 30 (25%) |
| 2                                   | 9 (21%)  | 5 (28%)  | 10 (24%) | 4 (21%)  | 28 (23%) |
| 3                                   | 4 (10%)  | 8 (44%)  | 1 (2%)   | 2 (11%)  | 15 (12%) |
| 4                                   | 0 (0%)   | 2 (11%)  | 0 (0%)   | 1 (5%)   | 3 (2%)   |
| <b>10. SMRs</b>                     |          |          |          |          |          |
| 0                                   | 3 (7%)   | 0 (0%)   | 4 (10%)  | 2 (11%)  | 9 (8%)   |
| 1                                   | 13 (31%) | 1 (6%)   | 9 (22%)  | 2 (11%)  | 25 (21%) |
| 2                                   | 18 (43%) | 5 (28%)  | 16 (39%) | 11 (58%) | 50 (42%) |
| 3                                   | 5 (12%)  | 7 (39%)  | 10 (24%) | 4 (21%)  | 26 (22%) |
| 4                                   | 3 (7%)   | 5 (28%)  | 2 (5%)   | 0 (0%)   | 10 (8%)  |

**11. Reduced words or AMRs per breath**

|   |          |         |          |         |          |
|---|----------|---------|----------|---------|----------|
| 0 | 28 (67%) | 8 (44%) | 30 (73%) | 5 (26%) | 71 (59%) |
| 1 | 7 (17%)  | 2 (11%) | 5 (12%)  | 4 (21%) | 18 (15%) |
| 2 | 4 (10%)  | 3 (17%) | 4 (10%)  | 6 (32%) | 17 (14%) |
| 3 | 3 (7%)   | 3 (17%) | 1 (2%)   | 2 (11%) | 9 (8%)   |
| 4 | 0 (0%)   | 2 (11%) | 1 (2%)   | 2 (11%) | 5 (4%)   |

**12. Visible/silent groping**

|   |          |         |          |          |          |
|---|----------|---------|----------|----------|----------|
| 0 | 31 (74%) | 7 (39%) | 20 (49%) | 10 (53%) | 68 (57%) |
| 1 | 10 (24%) | 7 (39%) | 15 (37%) | 8 (42%)  | 40 (33%) |
| 2 | 1 (2%)   | 2 (11%) | 3 (7%)   | 0 (0%)   | 6 (5%)   |
| 3 | 0 (0%)   | 1 (6%)  | 3 (7%)   | 1 (5%)   | 5 (4%)   |
| 4 | 0 (0%)   | 1 (6%)  | 0 (0%)   | 0 (0%)   | 1 (1%)   |

**13. False starts**

|   |          |         |          |          |          |
|---|----------|---------|----------|----------|----------|
| 0 | 13 (31%) | 6 (33%) | 4 (10%)  | 10 (53%) | 33 (28%) |
| 1 | 25 (60%) | 7 (39%) | 20 (49%) | 6 (32%)  | 58 (48%) |
| 2 | 3 (7%)   | 3 (17%) | 14 (34%) | 3 (16%)  | 23 (19%) |
| 3 | 1 (2%)   | 1 (6%)  | 2 (5%)   | 0 (0%)   | 4 (3%)   |
| 4 | 0 (0%)   | 1 (6%)  | 1 (2%)   | 0 (0%)   | 2 (2%)   |

**Total score**

|                 |             |             |             |             |             |
|-----------------|-------------|-------------|-------------|-------------|-------------|
| Median (Q1, Q3) | 14 (11, 22) | 26 (20, 35) | 14 (10, 20) | 18 (16, 21) | 16 (12, 23) |
|-----------------|-------------|-------------|-------------|-------------|-------------|

*Note.* 0 = feature not present; 4 = always evident or marked in severity. Total AOS Present group includes participants with or without dysarthria and aphasia.
